# Supplementary material for: Identification of Methylation Driven Biomarkers for Diagnosis and Prognosis in Colon Cancer by Integrative Analysis of TCGA, GTEx, and GEO Data
Source: Research Square preprint supplement (doi:10.21203/rs.3.rs-179363/v1), 2021-02-05
Supplement: Supplementary file 1 [file d9fcfddaa98c2f56456299b6.docx]

**Supplementary material**

**Figure S1.** Distribution map of the methylation degree of the ten MDGs. X-axis represents the degree of methylation and Y-axis represents the number of methylated samples.


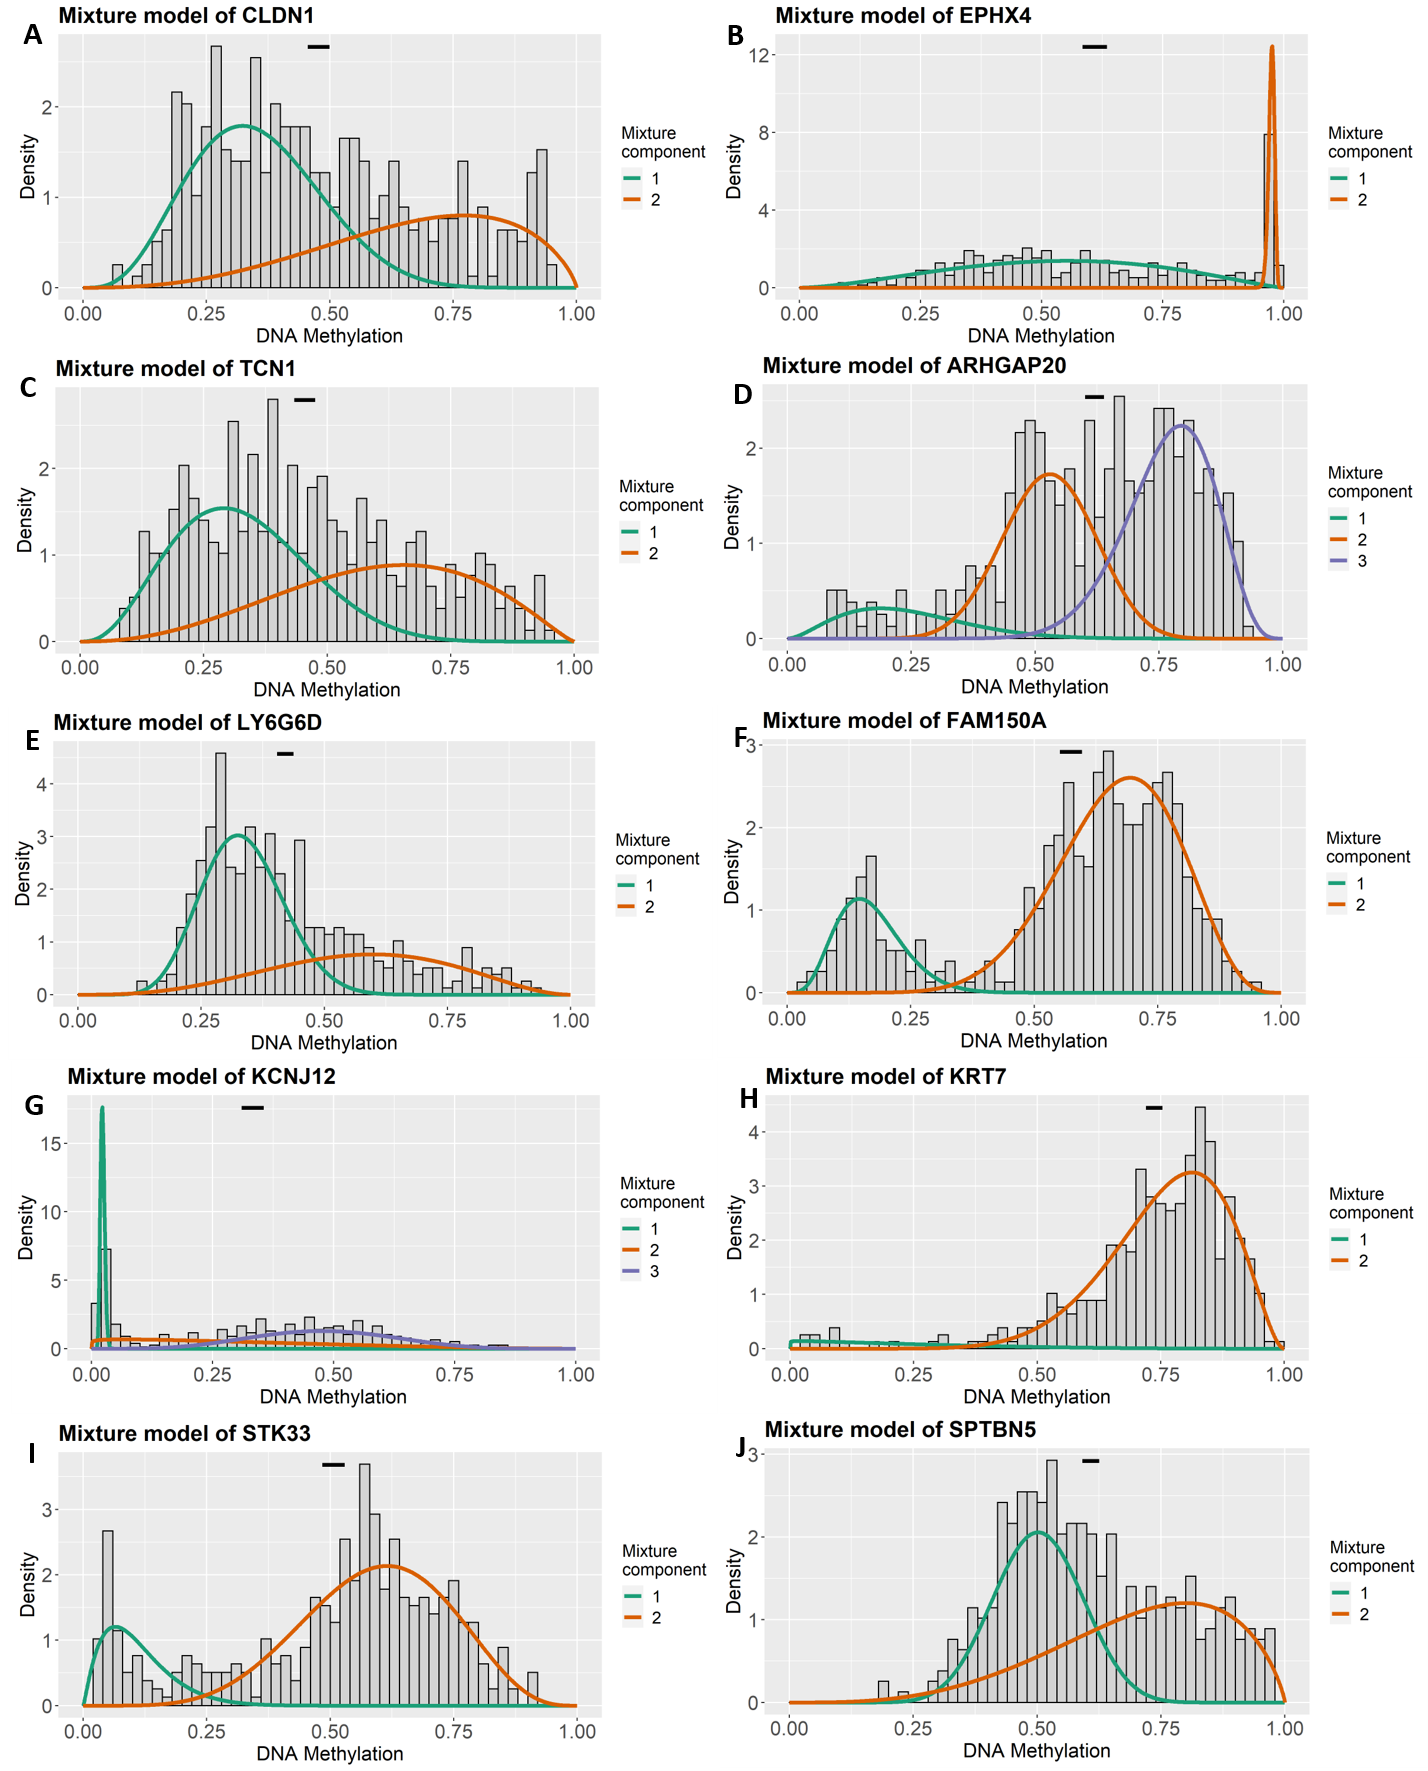


**Figure S2.** Correlation between the expression and methylation degree of the ten MDGs. X-axis represents the degree of methylation and Y-axis represents the gene expression level.


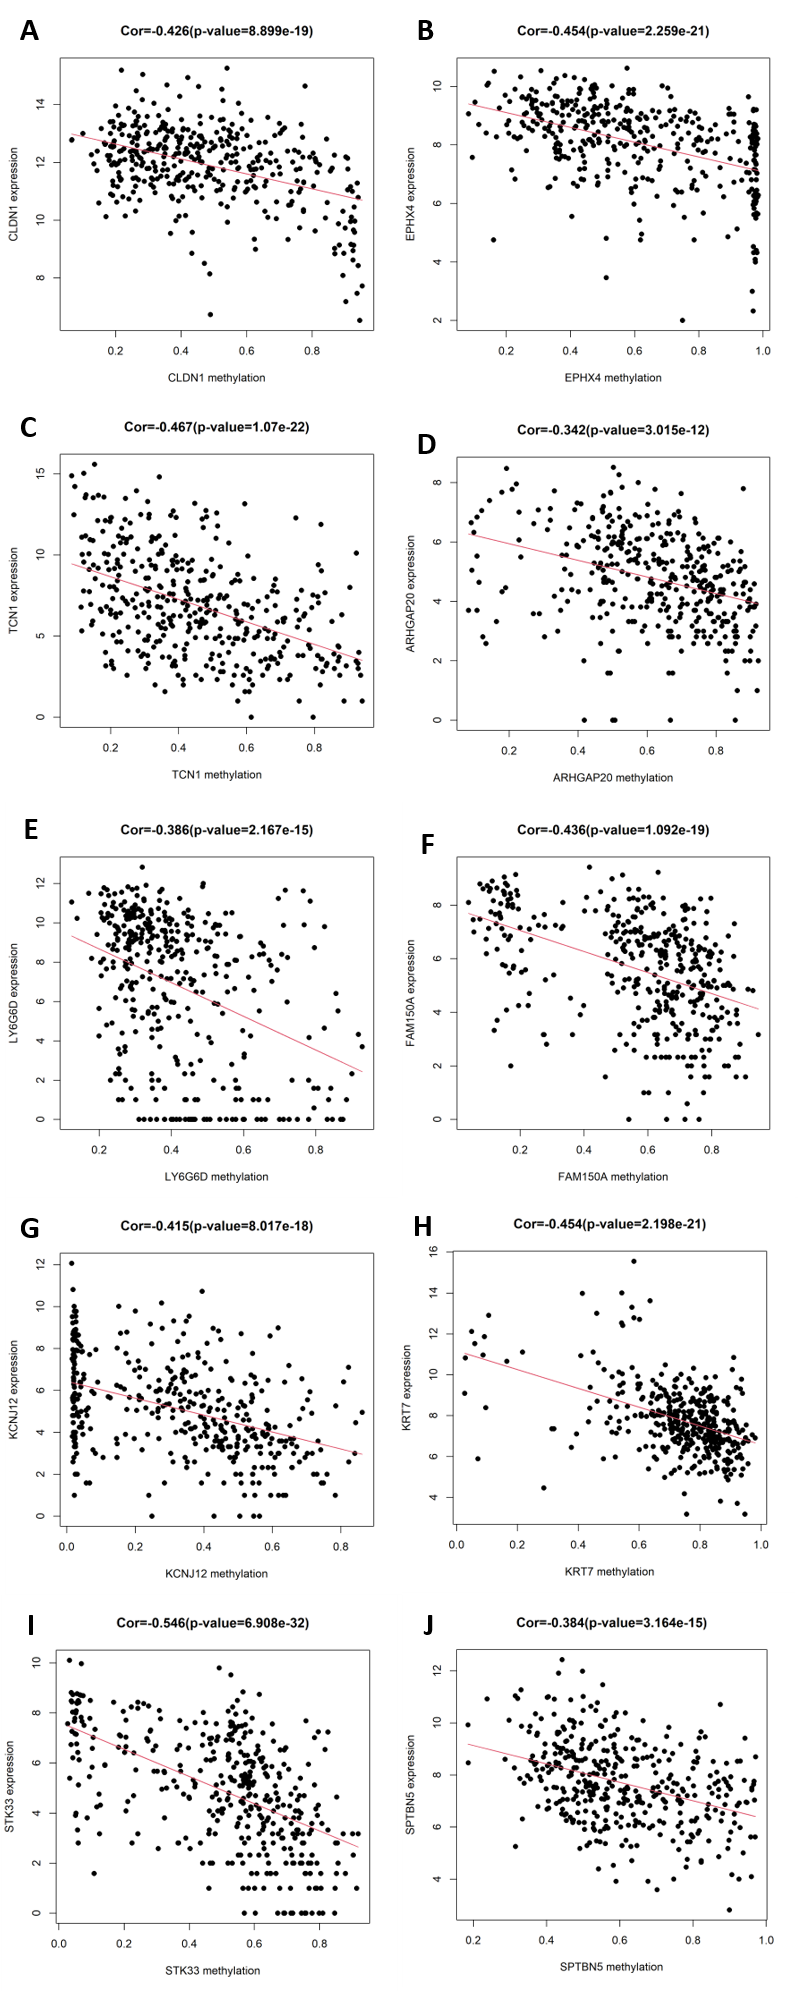


**Table S1**. Differentially expressed genes between tumor and normal samples

| **GeneName** | **logFC** | **AveExpr** | **t** | **P.Value** | **adj.P.Val** | **B** |
| --- | --- | --- | --- | --- | --- | --- |
| CLEC3B | -0.760 | 5.532 | -57.252 | 2.72E-261 | 4.42E-257 | 587.900 |
| CA7 | -1.354 | 5.182 | -51.331 | 2.93E-235 | 2.38E-231 | 527.744 |
| BEST4 | -1.219 | 5.237 | -48.996 | 1.72E-224 | 9.27E-221 | 503.168 |
| GCNT2 | -0.823 | 5.339 | -46.125 | 7.40E-211 | 3.00E-207 | 471.894 |
| SPIB | -1.080 | 5.299 | -45.250 | 1.30E-206 | 4.22E-203 | 462.241 |
| LYVE1 | -0.860 | 5.434 | -44.000 | 1.79E-200 | 4.83E-197 | 448.254 |
| SLC25A34 | -0.847 | 5.250 | -43.421 | 1.33E-197 | 3.09E-194 | 441.298 |
| FAM107A | -0.673 | 5.511 | -42.666 | 7.90E-194 | 1.60E-190 | 432.996 |
| ABCG2 | -0.832 | 5.499 | -42.075 | 7.36E-191 | 1.33E-187 | 426.215 |
| ABCA8 | -1.168 | 5.153 | -41.154 | 3.49E-186 | 5.65E-183 | 415.212 |
| C2orf88 | -0.612 | 5.840 | -39.717 | 8.36E-179 | 1.23E-175 | 398.553 |
| LIFR | -0.675 | 5.510 | -39.480 | 1.40E-177 | 1.90E-174 | 395.683 |
| BMP3 | -1.480 | 4.931 | -38.382 | 7.49E-172 | 9.34E-169 | 382.086 |
| PKIB | -0.670 | 5.820 | -37.323 | 2.82E-166 | 3.27E-163 | 369.733 |
| SCN9A | -0.912 | 5.196 | -37.296 | 3.93E-166 | 4.25E-163 | 369.182 |
| GLP2R | -1.011 | 5.055 | -37.221 | 9.77E-166 | 9.90E-163 | 368.044 |
| USP2 | -0.706 | 5.503 | -36.609 | 1.75E-162 | 1.58E-159 | 361.000 |
| SFRP1 | -1.166 | 5.190 | -36.613 | 1.67E-162 | 1.58E-159 | 360.944 |
| ABI3BP | -0.586 | 5.711 | -34.530 | 2.67E-151 | 1.97E-148 | 335.311 |
| SCARA5 | -1.053 | 5.437 | -34.257 | 8.18E-150 | 5.76E-147 | 331.902 |
| CA1 | -1.800 | 5.096 | -33.933 | 4.75E-148 | 3.21E-145 | 327.748 |
| TNXB | -0.659 | 5.737 | -33.834 | 1.64E-147 | 1.07E-144 | 326.585 |
| AFF3 | -0.751 | 5.178 | -33.445 | 2.20E-145 | 1.37E-142 | 321.405 |
| GSTM5 | -0.705 | 5.196 | -33.304 | 1.29E-144 | 7.75E-142 | 319.619 |
| MT1M | -1.044 | 5.319 | -32.756 | 1.32E-141 | 7.63E-139 | 313.023 |
| OGN | -1.295 | 5.003 | -32.469 | 5.01E-140 | 2.71E-137 | 309.247 |
| PRKG2 | -0.903 | 5.077 | -32.463 | 5.42E-140 | 2.84E-137 | 309.041 |
| ANK2 | -0.595 | 5.598 | -32.437 | 7.52E-140 | 3.81E-137 | 309.001 |
| TMEM72 | -1.190 | 5.006 | -32.417 | 9.68E-140 | 4.75E-137 | 308.544 |
| SLC51B | -0.749 | 5.622 | -32.114 | 4.56E-138 | 2.06E-135 | 304.890 |
| SLC4A4 | -0.926 | 5.713 | -32.081 | 6.88E-138 | 3.01E-135 | 304.440 |
| ADH1B | -1.246 | 5.300 | -31.850 | 1.32E-136 | 5.48E-134 | 301.543 |
| SULT1A2 | -0.874 | 5.255 | -31.704 | 8.37E-136 | 3.31E-133 | 299.630 |
| AQP8 | -1.535 | 5.232 | -31.666 | 1.37E-135 | 5.30E-133 | 299.198 |
| LRRN2 | -0.706 | 5.525 | -31.610 | 2.79E-135 | 1.05E-132 | 298.502 |
| GREM2 | -0.911 | 5.430 | -30.901 | 2.42E-131 | 8.17E-129 | 289.452 |
| CHGA | -1.309 | 5.383 | -30.870 | 3.58E-131 | 1.19E-128 | 289.058 |
| GNAO1 | -0.628 | 5.533 | -30.786 | 1.06E-130 | 3.37E-128 | 287.977 |
| STMN2 | -0.871 | 5.326 | -30.737 | 1.99E-130 | 6.19E-128 | 287.342 |
| ANO5 | -1.082 | 4.988 | -30.490 | 4.71E-129 | 1.41E-126 | 283.986 |
| ALPI | -1.064 | 5.222 | -30.448 | 8.03E-129 | 2.32E-126 | 283.637 |
| GUCA2A | -0.957 | 5.784 | -30.452 | 7.66E-129 | 2.26E-126 | 283.595 |
| CLCA4 | -1.423 | 5.431 | -30.163 | 3.15E-127 | 8.80E-125 | 279.986 |
| PYGM | -0.780 | 5.106 | -30.173 | 2.75E-127 | 7.83E-125 | 279.856 |
| MYOM1 | -0.618 | 5.395 | -29.957 | 4.44E-126 | 1.20E-123 | 277.330 |
| CD177 | -1.107 | 5.562 | -29.641 | 2.62E-124 | 6.86E-122 | 273.245 |
| PDZD4 | -0.768 | 5.153 | -29.452 | 2.97E-123 | 7.65E-121 | 270.687 |
| DCLK1 | -0.738 | 5.237 | -28.777 | 1.83E-119 | 4.18E-117 | 262.093 |
| CA4 | -1.336 | 5.424 | -28.376 | 3.30E-117 | 7.14E-115 | 256.955 |
| MS4A12 | -1.489 | 5.206 | -28.366 | 3.76E-117 | 8.03E-115 | 256.849 |
| LDB3 | -0.836 | 5.101 | -28.323 | 6.57E-117 | 1.37E-114 | 256.165 |
| DPT | -0.725 | 5.680 | -28.291 | 9.91E-117 | 1.98E-114 | 255.807 |
| MMRN1 | -0.845 | 5.347 | -28.119 | 9.29E-116 | 1.84E-113 | 253.650 |
| SCNN1B | -0.898 | 5.592 | -28.060 | 1.99E-115 | 3.84E-113 | 252.829 |
| C1QTNF7 | -0.791 | 5.063 | -27.901 | 1.56E-114 | 2.92E-112 | 250.617 |
| C7 | -0.776 | 5.637 | -27.853 | 2.91E-114 | 5.29E-112 | 250.144 |
| LILRB5 | -0.611 | 5.493 | -27.602 | 7.59E-113 | 1.31E-110 | 246.961 |
| CWH43 | -1.357 | 4.981 | -27.533 | 1.85E-112 | 3.16E-110 | 246.023 |
| CILP | -0.831 | 5.368 | -27.441 | 6.13E-112 | 1.04E-109 | 244.876 |
| TRPM6 | -0.757 | 5.686 | -27.427 | 7.34E-112 | 1.23E-109 | 244.602 |
| EPHA7 | -0.907 | 5.116 | -27.241 | 8.21E-111 | 1.32E-108 | 242.232 |
| TMEM236 | -0.677 | 5.761 | -27.165 | 2.22E-110 | 3.54E-108 | 241.170 |
| GFRA1 | -0.701 | 5.432 | -27.094 | 5.56E-110 | 8.76E-108 | 240.380 |
| CHGB | -1.016 | 5.076 | -27.067 | 7.90E-110 | 1.22E-107 | 239.981 |
| BEST2 | -1.392 | 4.940 | -27.053 | 9.46E-110 | 1.45E-107 | 239.789 |
| TMEM35 | -0.893 | 5.078 | -27.001 | 1.86E-109 | 2.77E-107 | 239.090 |
| ABCA6 | -0.733 | 5.080 | -27.008 | 1.70E-109 | 2.56E-107 | 239.045 |
| CA2 | -0.670 | 6.158 | -27.018 | 1.49E-109 | 2.25E-107 | 239.038 |
| C11orf86 | -1.217 | 5.099 | -26.990 | 2.14E-109 | 3.15E-107 | 239.025 |
| TMEM253 | -0.680 | 5.234 | -26.874 | 9.77E-109 | 1.37E-106 | 237.439 |
| ARHGAP20 | -0.753 | 5.015 | -26.507 | 1.15E-106 | 1.51E-104 | 232.473 |
| B4GALNT2 | -1.389 | 5.132 | -26.195 | 6.63E-105 | 8.60E-103 | 228.727 |
| GDPD2 | -0.743 | 5.402 | -26.010 | 7.37E-104 | 9.33E-102 | 226.323 |
| SSTR2 | -0.601 | 5.157 | -25.940 | 1.85E-103 | 2.32E-101 | 225.180 |
| CLEC10A | -0.678 | 5.430 | -25.876 | 4.24E-103 | 5.21E-101 | 224.578 |
| ZG16 | -1.251 | 5.673 | -25.612 | 1.32E-101 | 1.49E-99 | 220.977 |
| RBPMS2 | -0.594 | 5.420 | -25.541 | 3.32E-101 | 3.69E-99 | 220.233 |
| CP | -0.773 | 5.307 | -25.496 | 5.95E-101 | 6.57E-99 | 219.651 |
| MT1H | -0.888 | 5.356 | -25.488 | 6.60E-101 | 7.23E-99 | 219.538 |
| RUNDC3B | -0.599 | 5.292 | -25.465 | 8.83E-101 | 9.61E-99 | 219.219 |
| B3GALT1 | -1.192 | 4.939 | -25.366 | 3.20E-100 | 3.46E-98 | 217.910 |
| MPZ | -0.618 | 5.247 | -25.345 | 4.22E-100 | 4.53E-98 | 217.630 |
| TNFRSF17 | -1.015 | 5.009 | -25.345 | 4.25E-100 | 4.53E-98 | 217.623 |
| UGT1A10 | -0.812 | 5.482 | -25.251 | 1.44E-99 | 1.50E-97 | 216.427 |
| PTGDR | -0.915 | 5.102 | -25.021 | 2.86E-98 | 2.88E-96 | 213.461 |
| DNASE1L3 | -0.929 | 5.305 | -24.933 | 9.01E-98 | 9.02E-96 | 212.345 |
| C1orf95 | -0.958 | 5.063 | -24.900 | 1.38E-97 | 1.37E-95 | 211.897 |
| TMEM82 | -0.847 | 5.259 | -24.893 | 1.51E-97 | 1.49E-95 | 211.838 |
| CHL1 | -0.639 | 5.440 | -24.820 | 3.92E-97 | 3.76E-95 | 210.875 |
| ADAMTSL3 | -0.693 | 5.334 | -24.766 | 7.87E-97 | 7.46E-95 | 210.191 |
| LMO3 | -0.767 | 5.260 | -24.686 | 2.23E-96 | 2.09E-94 | 209.153 |
| BMX | -0.594 | 5.257 | -24.679 | 2.45E-96 | 2.28E-94 | 209.006 |
| PEG3 | -0.641 | 5.179 | -24.416 | 7.48E-95 | 6.74E-93 | 205.573 |
| HSD17B2 | -0.592 | 5.898 | -24.397 | 9.50E-95 | 8.51E-93 | 205.161 |
| DPF3 | -0.598 | 5.296 | -24.232 | 8.09E-94 | 7.05E-92 | 203.257 |
| EYA2 | -0.685 | 5.409 | -24.148 | 2.40E-93 | 2.08E-91 | 202.183 |
| GALNT16 | -0.768 | 5.051 | -23.917 | 4.83E-92 | 3.93E-90 | 199.084 |
| ADTRP | -0.652 | 5.812 | -23.917 | 4.81E-92 | 3.93E-90 | 198.984 |
| RNF150 | -0.609 | 5.436 | -23.893 | 6.60E-92 | 5.35E-90 | 198.877 |
| CHRDL1 | -0.809 | 5.526 | -23.827 | 1.56E-91 | 1.24E-89 | 197.937 |
| RELN | -0.892 | 5.021 | -23.735 | 5.09E-91 | 3.99E-89 | 196.792 |
| TMOD1 | -0.692 | 5.203 | -23.691 | 9.00E-91 | 7.02E-89 | 196.264 |
| FSIP2 | -0.617 | 5.409 | -23.519 | 8.38E-90 | 6.41E-88 | 194.056 |
| SLC17A4 | -0.696 | 5.576 | -23.459 | 1.83E-89 | 1.39E-87 | 193.183 |
| VIP | -0.959 | 5.376 | -23.369 | 5.87E-89 | 4.43E-87 | 192.069 |
| CHAD | -0.712 | 5.143 | -23.350 | 7.45E-89 | 5.60E-87 | 191.827 |
| PTGDR2 | -0.608 | 5.324 | -23.307 | 1.31E-88 | 9.75E-87 | 191.318 |
| HSPB6 | -0.627 | 5.690 | -23.102 | 1.85E-87 | 1.32E-85 | 188.517 |
| UGT2A3 | -0.879 | 5.604 | -23.080 | 2.47E-87 | 1.75E-85 | 188.234 |
| LPHN3 | -0.626 | 5.345 | -23.046 | 3.80E-87 | 2.66E-85 | 187.970 |
| IGLV7-43 | -0.942 | 5.288 | -23.045 | 3.88E-87 | 2.70E-85 | 187.927 |
| DHRS9 | -0.749 | 5.774 | -23.024 | 5.04E-87 | 3.48E-85 | 187.443 |
| HAND2 | -0.961 | 5.073 | -22.831 | 6.15E-86 | 4.03E-84 | 185.195 |
| CCDC152 | -0.626 | 5.189 | -22.817 | 7.39E-86 | 4.83E-84 | 184.971 |
| FAM189A2 | -0.740 | 5.014 | -22.803 | 8.76E-86 | 5.68E-84 | 184.696 |
| ACKR2 | -0.646 | 5.077 | -22.773 | 1.30E-85 | 8.42E-84 | 184.298 |
| IGSF10 | -0.854 | 4.998 | -22.573 | 1.72E-84 | 1.08E-82 | 181.813 |
| MADCAM1 | -0.668 | 5.181 | -22.431 | 1.06E-83 | 6.64E-82 | 180.024 |
| EDN3 | -0.716 | 5.666 | -22.241 | 1.22E-82 | 7.33E-81 | 177.436 |
| IGHV3-72 | -0.865 | 5.397 | -22.131 | 5.05E-82 | 2.98E-80 | 176.149 |
| GRIK5 | -0.715 | 5.048 | -22.089 | 8.70E-82 | 5.11E-80 | 175.584 |
| SGCA | -0.723 | 5.134 | -22.057 | 1.31E-81 | 7.64E-80 | 175.244 |
| BTNL8 | -0.652 | 5.743 | -21.976 | 3.69E-81 | 2.13E-79 | 174.001 |
| FER1L6 | -0.942 | 5.263 | -21.933 | 6.38E-81 | 3.63E-79 | 173.665 |
| HRASLS2 | -0.840 | 5.068 | -21.907 | 8.95E-81 | 5.08E-79 | 173.328 |
| ADH1C | -0.807 | 5.873 | -21.799 | 3.56E-80 | 1.98E-78 | 171.614 |
| KIAA1644 | -0.597 | 5.370 | -21.741 | 7.56E-80 | 4.16E-78 | 171.224 |
| TACR2 | -0.659 | 5.427 | -21.713 | 1.08E-79 | 5.87E-78 | 170.832 |
| AC073283.4 | -0.602 | 5.169 | -21.525 | 1.19E-78 | 6.20E-77 | 168.438 |
| ATP1B2 | -0.639 | 5.034 | -21.431 | 3.98E-78 | 2.02E-76 | 167.150 |
| PLIN4 | -0.794 | 5.354 | -21.357 | 1.02E-77 | 5.15E-76 | 166.288 |
| PLN | -0.586 | 5.612 | -21.270 | 3.12E-77 | 1.54E-75 | 165.067 |
| IGKV6-21 | -1.102 | 4.836 | -21.177 | 1.02E-76 | 4.95E-75 | 163.985 |
| SHISA3 | -0.797 | 5.040 | -21.148 | 1.48E-76 | 7.02E-75 | 163.650 |
| IGLV5-45 | -1.057 | 5.044 | -21.142 | 1.59E-76 | 7.53E-75 | 163.615 |
| CORO2B | -0.622 | 5.146 | -21.086 | 3.26E-76 | 1.52E-74 | 162.856 |
| MFAP5 | -0.608 | 5.639 | -21.092 | 3.02E-76 | 1.41E-74 | 162.786 |
| TPSG1 | -0.700 | 5.511 | -20.800 | 1.24E-74 | 5.60E-73 | 159.155 |
| IGKV1OR2-108 | -0.982 | 4.889 | -20.593 | 1.71E-73 | 7.54E-72 | 156.610 |
| CHST5 | -0.837 | 5.332 | -20.242 | 1.45E-71 | 6.03E-70 | 152.179 |
| IGLV7-46 | -0.821 | 5.447 | -20.157 | 4.25E-71 | 1.73E-69 | 151.039 |
| FABP2 | -0.788 | 5.552 | -20.106 | 8.12E-71 | 3.26E-69 | 150.327 |
| IGHV3-13 | -0.985 | 5.037 | -20.070 | 1.27E-70 | 5.06E-69 | 150.086 |
| IGLV2-8 | -0.733 | 5.640 | -19.947 | 6.00E-70 | 2.34E-68 | 148.287 |
| PRKAA2 | -0.879 | 5.034 | -19.630 | 3.20E-68 | 1.19E-66 | 144.585 |
| CALB2 | -0.837 | 5.177 | -19.592 | 5.16E-68 | 1.90E-66 | 144.098 |
| NPY1R | -0.817 | 5.010 | -19.589 | 5.39E-68 | 1.98E-66 | 144.050 |
| RP11-677M14.3 | -0.597 | 5.034 | -19.565 | 7.23E-68 | 2.63E-66 | 143.672 |
| MASP1 | -0.754 | 5.315 | -19.547 | 9.07E-68 | 3.29E-66 | 143.494 |
| CHRNA3 | -0.621 | 5.254 | -19.478 | 2.16E-67 | 7.78E-66 | 142.685 |
| LGALS9C | -0.760 | 5.340 | -19.464 | 2.55E-67 | 9.18E-66 | 142.449 |
| TRIM40 | -0.647 | 5.297 | -19.452 | 2.98E-67 | 1.07E-65 | 142.356 |
| IGKV2-24 | -0.798 | 5.430 | -19.419 | 4.49E-67 | 1.60E-65 | 141.821 |
| AKR1B10 | -0.668 | 5.825 | -19.355 | 9.93E-67 | 3.50E-65 | 140.773 |
| KIF5A | -0.686 | 5.124 | -19.198 | 7.06E-66 | 2.42E-64 | 139.216 |
| B3GNT6 | -1.019 | 5.389 | -19.198 | 7.06E-66 | 2.42E-64 | 139.053 |
| ASPG | -0.812 | 5.120 | -19.141 | 1.43E-65 | 4.83E-64 | 138.516 |
| TRPV3 | -0.686 | 5.163 | -18.968 | 1.23E-64 | 4.04E-63 | 136.374 |
| ASXL3 | -0.827 | 4.925 | -18.959 | 1.39E-64 | 4.52E-63 | 136.212 |
| MS4A2 | -0.723 | 5.031 | -18.924 | 2.14E-64 | 6.87E-63 | 135.803 |
| IGHV3-74 | -0.663 | 5.762 | -18.932 | 1.92E-64 | 6.21E-63 | 135.568 |
| CCL19 | -0.711 | 5.306 | -18.888 | 3.32E-64 | 1.05E-62 | 135.346 |
| IGKV3D-20 | -0.841 | 5.223 | -18.874 | 3.97E-64 | 1.25E-62 | 135.169 |
| IGLV1-36 | -1.002 | 4.879 | -18.775 | 1.35E-63 | 4.19E-62 | 133.972 |
| IGLV2-18 | -0.949 | 5.078 | -18.720 | 2.66E-63 | 8.17E-62 | 133.313 |
| SI | -0.935 | 5.485 | -18.697 | 3.53E-63 | 1.08E-61 | 132.805 |
| HEPACAM2 | -0.800 | 5.668 | -18.516 | 3.28E-62 | 9.81E-61 | 130.480 |
| FAM189A1 | -0.794 | 5.309 | -18.418 | 1.10E-61 | 3.21E-60 | 129.530 |
| IGKV1-27 | -0.725 | 5.521 | -18.428 | 9.69E-62 | 2.84E-60 | 129.528 |
| MS4A1 | -0.886 | 5.053 | -18.391 | 1.54E-61 | 4.43E-60 | 129.285 |
| CR2 | -0.860 | 5.156 | -18.384 | 1.68E-61 | 4.83E-60 | 129.172 |
| TM6SF2 | -0.689 | 4.999 | -18.243 | 9.40E-61 | 2.64E-59 | 127.447 |
| LYPD8 | -0.728 | 5.930 | -18.169 | 2.32E-60 | 6.44E-59 | 126.048 |
| IGKV1-16 | -0.673 | 5.605 | -18.130 | 3.78E-60 | 1.04E-58 | 125.826 |
| CHP2 | -0.776 | 5.877 | -18.146 | 3.09E-60 | 8.51E-59 | 125.787 |
| IGKV1-17 | -0.695 | 5.584 | -18.097 | 5.66E-60 | 1.55E-58 | 125.432 |
| IGLV4-69 | -0.754 | 5.592 | -18.070 | 7.81E-60 | 2.13E-58 | 125.090 |
| IGKV1-8 | -0.910 | 4.976 | -17.969 | 2.69E-59 | 7.15E-58 | 124.153 |
| ACKR1 | -0.585 | 5.629 | -17.977 | 2.43E-59 | 6.47E-58 | 123.985 |
| VSIG2 | -0.698 | 5.866 | -17.993 | 2.00E-59 | 5.36E-58 | 123.954 |
| KIAA0125 | -0.805 | 5.053 | -17.940 | 3.81E-59 | 1.01E-57 | 123.806 |
| BMP5 | -0.834 | 5.188 | -17.901 | 6.14E-59 | 1.61E-57 | 123.295 |
| IGHV3-49 | -0.690 | 5.606 | -17.917 | 5.06E-59 | 1.34E-57 | 123.229 |
| COL4A6 | -0.792 | 5.002 | -17.874 | 8.51E-59 | 2.22E-57 | 122.999 |
| IGHV1-58 | -0.985 | 4.911 | -17.852 | 1.12E-58 | 2.90E-57 | 122.731 |
| IGLV3-1 | -0.649 | 5.659 | -17.789 | 2.41E-58 | 6.16E-57 | 121.644 |
| IGLV10-54 | -1.070 | 5.084 | -17.700 | 7.12E-58 | 1.80E-56 | 120.852 |
| IGKV1-9 | -0.659 | 5.681 | -17.717 | 5.79E-58 | 1.46E-56 | 120.748 |
| IGHV1-2 | -0.719 | 5.569 | -17.676 | 9.48E-58 | 2.38E-56 | 120.322 |
| CREB3L3 | -0.832 | 4.984 | -17.597 | 2.46E-57 | 6.03E-56 | 119.659 |
| IGLV3-9 | -0.858 | 5.227 | -17.413 | 2.29E-56 | 5.38E-55 | 117.374 |
| CCL13 | -0.825 | 5.112 | -17.346 | 5.10E-56 | 1.19E-54 | 116.638 |
| IGHV3-11 | -0.658 | 5.676 | -17.240 | 1.82E-55 | 4.17E-54 | 115.014 |
| MAPT | -0.602 | 5.176 | -17.190 | 3.35E-55 | 7.56E-54 | 114.782 |
| IGHV3-73 | -0.753 | 5.394 | -17.125 | 7.28E-55 | 1.63E-53 | 113.844 |
| TRHDE | -0.657 | 5.212 | -17.075 | 1.32E-54 | 2.93E-53 | 113.398 |
| CDH3 | 1.084 | 6.295 | 16.945 | 6.20E-54 | 1.34E-52 | 111.737 |
| IGKV3D-11 | -0.905 | 4.914 | -16.904 | 1.02E-53 | 2.17E-52 | 111.387 |
| MB | -0.687 | 5.342 | -16.890 | 1.20E-53 | 2.55E-52 | 111.132 |
| ETV4 | 0.868 | 6.347 | 16.830 | 2.45E-53 | 5.13E-52 | 110.520 |
| IGHV3-21 | -0.632 | 5.691 | -16.843 | 2.09E-53 | 4.39E-52 | 110.282 |
| IGHV3-66 | -0.862 | 5.059 | -16.802 | 3.43E-53 | 7.13E-52 | 110.177 |
| ITLN1 | -0.922 | 5.773 | -16.744 | 6.85E-53 | 1.40E-51 | 108.979 |
| CCL8 | -0.778 | 5.050 | -16.688 | 1.32E-52 | 2.69E-51 | 108.842 |
| IGKV1-6 | -0.665 | 5.555 | -16.615 | 3.13E-52 | 6.29E-51 | 107.700 |
| SLC13A2 | -0.745 | 5.493 | -16.534 | 8.21E-52 | 1.63E-50 | 106.755 |
| IGLV1-44 | -0.585 | 5.797 | -16.548 | 6.95E-52 | 1.38E-50 | 106.718 |
| IGHV3-64 | -0.971 | 4.840 | -16.487 | 1.42E-51 | 2.77E-50 | 106.479 |
| IGHV3-53 | -0.742 | 5.385 | -16.476 | 1.62E-51 | 3.15E-50 | 106.184 |
| RBM24 | -0.625 | 5.071 | -16.446 | 2.31E-51 | 4.43E-50 | 106.008 |
| IGLV3-10 | -0.740 | 5.508 | -16.334 | 8.63E-51 | 1.63E-49 | 104.405 |
| RETNLB | -0.612 | 5.616 | -16.190 | 4.69E-50 | 8.63E-49 | 102.677 |
| CLCA1 | -0.964 | 5.963 | -16.164 | 6.35E-50 | 1.16E-48 | 101.994 |
| SLC26A3 | -0.742 | 6.208 | -16.173 | 5.71E-50 | 1.05E-48 | 101.956 |
| ANKRD36BP2 | -0.667 | 5.087 | -16.094 | 1.45E-49 | 2.59E-48 | 101.899 |
| IGHV3-43 | -0.846 | 5.021 | -16.092 | 1.48E-49 | 2.64E-48 | 101.872 |
| CIDEC | -0.651 | 5.279 | -16.093 | 1.46E-49 | 2.62E-48 | 101.828 |
| IGKV2D-29 | -0.873 | 5.094 | -16.080 | 1.69E-49 | 3.02E-48 | 101.710 |
| UGT2B15 | -0.759 | 5.323 | -15.907 | 1.26E-48 | 2.18E-47 | 99.594 |
| IGHV2-26 | -0.837 | 5.127 | -15.867 | 2.03E-48 | 3.47E-47 | 99.229 |
| NXPE4 | -0.730 | 5.831 | -15.754 | 7.48E-48 | 1.25E-46 | 97.398 |
| IGLC7 | -0.914 | 4.963 | -15.698 | 1.43E-47 | 2.37E-46 | 97.337 |
| MAFG-AS1 | 0.696 | 5.742 | 15.653 | 2.41E-47 | 3.93E-46 | 96.494 |
| UBE2QL1 | -0.614 | 5.060 | -15.599 | 4.47E-47 | 7.22E-46 | 96.211 |
| IGHV4-28 | -0.723 | 5.259 | -15.423 | 3.36E-46 | 5.21E-45 | 94.122 |
| IGHV3-33 | -0.618 | 5.626 | -15.434 | 2.99E-46 | 4.65E-45 | 93.937 |
| IGKV1D-8 | -0.879 | 4.903 | -15.177 | 5.59E-45 | 8.25E-44 | 91.424 |
| IGLV2-11 | -0.596 | 5.847 | -15.019 | 3.34E-44 | 4.80E-43 | 89.052 |
| IGHV2-70 | -0.846 | 5.043 | -14.919 | 1.04E-43 | 1.46E-42 | 88.497 |
| EEF1A2 | -0.629 | 5.114 | -14.915 | 1.09E-43 | 1.53E-42 | 88.472 |
| KCNG1 | -0.636 | 5.125 | -14.701 | 1.20E-42 | 1.62E-41 | 86.086 |
| CEACAM7 | -0.595 | 6.287 | -14.689 | 1.37E-42 | 1.84E-41 | 85.017 |
| IGLV6-57 | -0.594 | 5.705 | -14.632 | 2.60E-42 | 3.44E-41 | 84.840 |
| IGHV3-48 | -0.655 | 5.448 | -14.449 | 1.98E-41 | 2.53E-40 | 83.055 |
| ESM1 | 1.699 | 5.684 | 14.616 | 3.10E-42 | 4.07E-41 | 82.520 |
| KLK15 | -0.733 | 4.974 | -14.363 | 5.14E-41 | 6.48E-40 | 82.377 |
| RP11-349K16.1 | -0.730 | 5.181 | -14.279 | 1.31E-40 | 1.62E-39 | 81.365 |
| OTC | -0.861 | 4.954 | -14.178 | 3.93E-40 | 4.72E-39 | 80.349 |
| SLC28A2 | -0.716 | 5.297 | -14.137 | 6.21E-40 | 7.39E-39 | 79.734 |
| RP5-884M6.1 | 2.384 | 4.983 | 14.355 | 5.63E-41 | 7.07E-40 | 79.721 |
| NXPE1 | -0.611 | 5.779 | -14.147 | 5.55E-40 | 6.63E-39 | 79.418 |
| IGHV4-61 | -0.810 | 5.128 | -14.092 | 1.02E-39 | 1.20E-38 | 79.356 |
| LGALS9B | -0.707 | 5.260 | -13.928 | 6.03E-39 | 6.89E-38 | 77.514 |
| IGHV4-31 | -0.641 | 5.481 | -13.897 | 8.51E-39 | 9.66E-38 | 76.994 |
| KCNK10 | -0.588 | 5.189 | -13.837 | 1.63E-38 | 1.84E-37 | 76.626 |
| SLITRK6 | -0.643 | 5.353 | -13.816 | 2.04E-38 | 2.28E-37 | 76.247 |
| CASC19 | 1.800 | 5.022 | 14.020 | 2.23E-39 | 2.60E-38 | 76.241 |
| CEMIP | 0.777 | 6.360 | 13.559 | 3.25E-37 | 3.45E-36 | 73.639 |
| IGHV4-55 | -0.753 | 5.064 | -13.537 | 4.11E-37 | 4.35E-36 | 73.450 |
| IGLV8-61 | -0.752 | 5.401 | -13.348 | 3.09E-36 | 3.14E-35 | 71.148 |
| RP5-1120P11.1 | 1.646 | 5.212 | 13.515 | 5.19E-37 | 5.46E-36 | 71.110 |
| TMEM61 | -0.635 | 5.084 | -13.256 | 8.20E-36 | 8.13E-35 | 70.499 |
| SLC52A1 | -0.626 | 5.001 | -13.209 | 1.34E-35 | 1.32E-34 | 70.033 |
| CLDN1 | 0.772 | 6.307 | 13.207 | 1.37E-35 | 1.35E-34 | 69.952 |
| PCSK1N | -0.805 | 5.096 | -13.174 | 1.95E-35 | 1.89E-34 | 69.595 |
| LINC00460 | 2.273 | 4.851 | 13.323 | 4.01E-36 | 4.05E-35 | 69.137 |
| PAX5 | -0.716 | 5.084 | -13.120 | 3.42E-35 | 3.28E-34 | 69.051 |
| IGLV3-27 | -0.822 | 4.953 | -13.046 | 7.48E-35 | 7.05E-34 | 68.312 |
| SPATA12 | 1.137 | 5.122 | 13.146 | 2.62E-35 | 2.53E-34 | 67.386 |
| AC009014.3 | -0.613 | 5.434 | -12.979 | 1.50E-34 | 1.39E-33 | 67.357 |
| IGHD | -0.826 | 4.885 | -12.887 | 3.93E-34 | 3.58E-33 | 66.686 |
| FJX1 | 0.660 | 5.686 | 12.793 | 1.05E-33 | 9.34E-33 | 65.609 |
| CST2 | 2.176 | 4.926 | 12.967 | 1.71E-34 | 1.58E-33 | 65.597 |
| IGHV1-69 | -0.715 | 5.232 | -12.741 | 1.79E-33 | 1.58E-32 | 65.027 |
| PLA2G2D | -0.689 | 5.033 | -12.717 | 2.29E-33 | 2.00E-32 | 64.921 |
| EDN2 | -0.669 | 4.983 | -12.633 | 5.44E-33 | 4.67E-32 | 64.088 |
| SFTA2 | 2.409 | 4.973 | 12.593 | 8.18E-33 | 6.98E-32 | 61.946 |
| MDFI | 0.732 | 5.941 | 12.385 | 6.88E-32 | 5.60E-31 | 61.592 |
| FAM227A | 0.684 | 5.444 | 12.344 | 1.04E-31 | 8.40E-31 | 60.812 |
| GABRD | 0.910 | 5.283 | 12.418 | 4.91E-32 | 4.02E-31 | 60.607 |
| AC007128.1 | 1.992 | 4.843 | 12.338 | 1.10E-31 | 8.85E-31 | 59.466 |
| RPL41P1 | -0.834 | 4.978 | -11.861 | 1.31E-29 | 9.49E-29 | 56.220 |
| PLEKHN1 | 0.856 | 5.619 | 11.750 | 3.91E-29 | 2.77E-28 | 55.043 |
| ACAN | 0.889 | 5.818 | 11.712 | 5.67E-29 | 3.98E-28 | 54.880 |
| C17orf96 | 0.704 | 5.931 | 11.686 | 7.34E-29 | 5.11E-28 | 54.720 |
| LINC00659 | 2.119 | 4.826 | 11.806 | 2.26E-29 | 1.62E-28 | 54.429 |
| PNLIPRP2 | -0.741 | 5.083 | -11.535 | 3.20E-28 | 2.16E-27 | 53.140 |
| PNCK | -0.655 | 5.047 | -11.391 | 1.28E-27 | 8.47E-27 | 51.818 |
| NLRP2 | -0.628 | 5.269 | -11.272 | 4.03E-27 | 2.59E-26 | 50.532 |
| IGFL4 | 1.907 | 5.138 | 11.364 | 1.67E-27 | 1.09E-26 | 50.387 |
| UGT2B17 | -0.913 | 5.504 | -11.198 | 8.18E-27 | 5.18E-26 | 49.428 |
| KCNJ12 | -0.609 | 5.037 | -11.105 | 1.96E-26 | 1.22E-25 | 49.146 |
| OXTR | 0.741 | 5.403 | 11.103 | 2.01E-26 | 1.25E-25 | 48.861 |
| CASC21 | 2.248 | 4.971 | 11.174 | 1.03E-26 | 6.48E-26 | 48.653 |
| KRT80 | 1.490 | 6.085 | 11.034 | 3.85E-26 | 2.36E-25 | 48.201 |
| MCIDAS | 1.600 | 4.970 | 11.114 | 1.81E-26 | 1.13E-25 | 48.111 |
| SALL4 | 1.492 | 5.456 | 11.066 | 2.84E-26 | 1.76E-25 | 47.715 |
| DACT2 | -0.585 | 5.108 | -10.886 | 1.54E-25 | 9.18E-25 | 47.074 |
| PRSS22 | 0.851 | 6.031 | 10.843 | 2.30E-25 | 1.36E-24 | 46.793 |
| SLC15A1 | -0.655 | 5.278 | -10.797 | 3.54E-25 | 2.08E-24 | 46.066 |
| CBX2 | 0.691 | 5.942 | 10.686 | 9.91E-25 | 5.69E-24 | 45.344 |
| WDR66 | 0.632 | 5.509 | 10.690 | 9.54E-25 | 5.49E-24 | 45.307 |
| WNT2 | 1.646 | 5.730 | 10.719 | 7.27E-25 | 4.20E-24 | 44.652 |
| APLN | 0.704 | 5.820 | 10.576 | 2.70E-24 | 1.52E-23 | 44.375 |
| RP11-680F8.1 | -0.598 | 5.073 | -10.542 | 3.70E-24 | 2.07E-23 | 43.960 |
| WNT3 | 0.608 | 5.580 | 10.505 | 5.18E-24 | 2.87E-23 | 43.705 |
| RP11-386G11.5 | 1.072 | 5.091 | 10.602 | 2.14E-24 | 1.21E-23 | 43.602 |
| IGHJ3 | -0.748 | 4.959 | -10.473 | 6.96E-24 | 3.82E-23 | 43.372 |
| RAET1L | 1.610 | 4.934 | 10.423 | 1.09E-23 | 5.91E-23 | 42.053 |
| LRRC8E | 0.860 | 5.177 | 10.366 | 1.83E-23 | 9.82E-23 | 41.698 |
| FAM222A-AS1 | 1.334 | 5.016 | 10.363 | 1.88E-23 | 1.00E-22 | 41.541 |
| BTBD16 | 1.241 | 5.083 | 10.294 | 3.48E-23 | 1.84E-22 | 40.962 |
| INHBA | 0.986 | 6.059 | 10.152 | 1.24E-22 | 6.35E-22 | 40.616 |
| C6orf223 | 1.080 | 6.097 | 9.977 | 5.81E-22 | 2.87E-21 | 39.102 |
| ATG9B | 0.796 | 5.663 | 9.962 | 6.64E-22 | 3.27E-21 | 38.929 |
| KLHL35 | 0.782 | 5.657 | 9.743 | 4.49E-21 | 2.10E-20 | 37.056 |
| EGFL6 | 0.989 | 5.507 | 9.756 | 4.00E-21 | 1.88E-20 | 36.901 |
| KIAA1257 | 0.795 | 5.615 | 9.721 | 5.42E-21 | 2.53E-20 | 36.859 |
| FOXP4-AS1 | 0.614 | 5.462 | 9.636 | 1.13E-20 | 5.15E-20 | 36.151 |
| CGREF1 | 0.640 | 6.070 | 9.634 | 1.14E-20 | 5.24E-20 | 36.040 |
| LEMD1 | 2.030 | 5.245 | 9.695 | 6.75E-21 | 3.13E-20 | 35.988 |
| SERPINA6 | -0.656 | 5.041 | -9.620 | 1.29E-20 | 5.88E-20 | 35.908 |
| CHRM1 | -0.600 | 4.943 | -9.581 | 1.79E-20 | 8.10E-20 | 35.667 |
| GPR3 | 0.852 | 5.262 | 9.611 | 1.39E-20 | 6.33E-20 | 35.522 |
| PRR7-AS1 | 0.864 | 5.027 | 9.620 | 1.29E-20 | 5.87E-20 | 35.362 |
| ADAMTS12 | 0.616 | 5.991 | 9.469 | 4.66E-20 | 2.06E-19 | 34.683 |
| IL23A | 0.618 | 5.450 | 9.454 | 5.27E-20 | 2.32E-19 | 34.645 |
| CCNO | 0.684 | 5.836 | 9.439 | 5.96E-20 | 2.62E-19 | 34.555 |
| CFAP45 | 0.655 | 5.107 | 9.483 | 4.14E-20 | 1.84E-19 | 34.535 |
| PRR7 | 0.622 | 5.848 | 9.432 | 6.32E-20 | 2.78E-19 | 34.487 |
| FOSL1 | 0.717 | 5.903 | 9.404 | 8.03E-20 | 3.50E-19 | 34.249 |
| GRIN2D | 0.911 | 6.113 | 9.361 | 1.16E-19 | 5.01E-19 | 33.881 |
| STK33 | -0.588 | 4.906 | -9.357 | 1.19E-19 | 5.17E-19 | 33.806 |
| EPHX4 | 1.110 | 5.717 | 9.339 | 1.39E-19 | 5.98E-19 | 33.597 |
| MIR17HG | 0.646 | 5.490 | 9.274 | 2.38E-19 | 1.02E-18 | 33.191 |
| DDN | 1.400 | 5.442 | 9.306 | 1.83E-19 | 7.84E-19 | 32.872 |
| FIRRE | 1.780 | 4.806 | 9.307 | 1.80E-19 | 7.74E-19 | 32.856 |
| PTGES2-AS1 | 1.101 | 4.952 | 9.306 | 1.83E-19 | 7.84E-19 | 32.850 |
| ULBP2 | 1.198 | 5.127 | 9.274 | 2.37E-19 | 1.01E-18 | 32.612 |
| CCAT1 | 1.134 | 5.819 | 9.156 | 6.32E-19 | 2.63E-18 | 32.188 |
| RP11-350J20.12 | 1.537 | 4.949 | 9.195 | 4.60E-19 | 1.93E-18 | 31.980 |
| S100A2 | 0.812 | 5.708 | 9.073 | 1.25E-18 | 5.12E-18 | 31.588 |
| AP006285.2 | 0.607 | 5.425 | 9.052 | 1.48E-18 | 6.05E-18 | 31.394 |
| GYLTL1B | 0.742 | 6.126 | 9.016 | 1.99E-18 | 8.06E-18 | 30.988 |
| PERM1 | 0.971 | 5.253 | 9.044 | 1.58E-18 | 6.44E-18 | 30.865 |
| TRIM29 | 0.620 | 6.258 | 9.000 | 2.26E-18 | 9.13E-18 | 30.646 |
| NOX4 | 0.987 | 5.318 | 8.980 | 2.67E-18 | 1.07E-17 | 30.461 |
| MSX1 | 0.668 | 5.691 | 8.892 | 5.42E-18 | 2.14E-17 | 30.160 |
| RP11-126L15.4 | 0.667 | 5.145 | 8.866 | 6.70E-18 | 2.64E-17 | 29.688 |
| ZBED9 | -0.713 | 4.822 | -8.816 | 9.97E-18 | 3.88E-17 | 29.469 |
| SHISA6 | -0.650 | 4.856 | -8.812 | 1.03E-17 | 4.00E-17 | 29.434 |
| SULT2B1 | 0.608 | 6.042 | 8.801 | 1.12E-17 | 4.35E-17 | 29.261 |
| PDX1 | 1.049 | 5.933 | 8.768 | 1.47E-17 | 5.67E-17 | 29.187 |
| RP5-908M14.5 | 1.307 | 4.885 | 8.810 | 1.05E-17 | 4.07E-17 | 29.021 |
| SLC18A1 | -0.619 | 4.966 | -8.700 | 2.52E-17 | 9.57E-17 | 28.526 |
| HNRNPA1P21 | 0.760 | 4.994 | 8.717 | 2.20E-17 | 8.37E-17 | 28.330 |
| VWA2 | 0.748 | 5.996 | 8.610 | 5.12E-17 | 1.91E-16 | 27.883 |
| GRHL3 | 0.911 | 5.590 | 8.602 | 5.47E-17 | 2.03E-16 | 27.857 |
| SPTBN5 | 0.598 | 5.689 | 8.595 | 5.77E-17 | 2.14E-16 | 27.836 |
| OTX1 | 1.911 | 5.256 | 8.641 | 4.03E-17 | 1.51E-16 | 27.764 |
| EVA1A | 0.775 | 5.779 | 8.540 | 8.90E-17 | 3.28E-16 | 27.429 |
| CYSRT1 | 0.744 | 5.193 | 8.571 | 6.98E-17 | 2.58E-16 | 27.426 |
| RP11-150O12.1 | 0.900 | 5.397 | 8.536 | 9.17E-17 | 3.37E-16 | 27.237 |
| CTHRC1 | 0.611 | 6.044 | 8.542 | 8.76E-17 | 3.22E-16 | 27.225 |
| RP11-1029J19.4 | 1.164 | 5.028 | 8.558 | 7.74E-17 | 2.86E-16 | 27.139 |
| SLC39A2 | -0.738 | 4.785 | -8.498 | 1.23E-16 | 4.51E-16 | 27.016 |
| HAGHL | 0.626 | 5.825 | 8.490 | 1.32E-16 | 4.80E-16 | 27.002 |
| CCDC78 | 0.963 | 5.467 | 8.469 | 1.54E-16 | 5.59E-16 | 26.749 |
| FEZF1-AS1 | 2.462 | 4.869 | 8.404 | 2.54E-16 | 9.13E-16 | 26.012 |
| BLACAT1 | 1.646 | 5.541 | 8.253 | 8.13E-16 | 2.83E-15 | 24.932 |
| RP11-713M15.2 | 0.587 | 5.623 | 8.203 | 1.18E-15 | 4.07E-15 | 24.901 |
| RP11-424C20.2 | 0.621 | 5.149 | 8.209 | 1.13E-15 | 3.90E-15 | 24.830 |
| IRX5 | 1.459 | 4.863 | 8.228 | 9.80E-16 | 3.39E-15 | 24.736 |
| MAPK15 | 0.998 | 5.628 | 8.184 | 1.37E-15 | 4.71E-15 | 24.728 |
| C2orf61 | 1.669 | 4.873 | 8.207 | 1.15E-15 | 3.95E-15 | 24.589 |
| SH3TC2 | 0.629 | 5.853 | 8.127 | 2.10E-15 | 7.13E-15 | 24.263 |
| LINC01572 | 0.595 | 4.977 | 8.129 | 2.07E-15 | 7.04E-15 | 24.150 |
| LINC00858 | 1.952 | 4.759 | 8.145 | 1.83E-15 | 6.24E-15 | 24.143 |
| KIF26B | 0.608 | 5.855 | 8.106 | 2.45E-15 | 8.28E-15 | 24.086 |
| ASCL5 | 1.275 | 5.062 | 8.127 | 2.10E-15 | 7.14E-15 | 24.022 |
| LRRC26 | -0.603 | 5.305 | -8.128 | 2.09E-15 | 7.09E-15 | 23.952 |
| GLS2 | 0.758 | 5.121 | 8.084 | 2.89E-15 | 9.73E-15 | 23.811 |
| MIR503HG | 0.968 | 5.090 | 8.006 | 5.20E-15 | 1.72E-14 | 23.169 |
| CLDN16 | 1.143 | 4.886 | 8.002 | 5.33E-15 | 1.77E-14 | 23.138 |
| RNF183 | 0.767 | 5.611 | 7.955 | 7.59E-15 | 2.49E-14 | 23.117 |
| FAP | 0.655 | 5.802 | 7.952 | 7.71E-15 | 2.53E-14 | 23.015 |
| CTD-2147F2.1 | 1.945 | 4.824 | 7.924 | 9.51E-15 | 3.11E-14 | 22.593 |
| SHISA2 | 0.675 | 5.524 | 7.876 | 1.35E-14 | 4.37E-14 | 22.558 |
| SMKR1 | 1.200 | 5.182 | 7.893 | 1.19E-14 | 3.86E-14 | 22.391 |
| STC2 | 0.698 | 6.012 | 7.877 | 1.34E-14 | 4.34E-14 | 22.365 |
| GTF2IP1 | -0.729 | 4.418 | -7.814 | 2.13E-14 | 6.78E-14 | 22.106 |
| C2orf70 | 0.789 | 5.642 | 7.795 | 2.45E-14 | 7.77E-14 | 21.983 |
| KRT7 | 0.598 | 5.683 | 7.798 | 2.38E-14 | 7.58E-14 | 21.959 |
| LINC01356 | 0.953 | 5.032 | 7.829 | 1.91E-14 | 6.10E-14 | 21.939 |
| SIM2 | 0.876 | 5.897 | 7.781 | 2.71E-14 | 8.58E-14 | 21.846 |
| CPNE7 | 1.108 | 5.998 | 7.760 | 3.14E-14 | 9.88E-14 | 21.734 |
| AC021218.2 | 0.827 | 5.983 | 7.768 | 2.97E-14 | 9.36E-14 | 21.701 |
| ADAM12 | 0.678 | 5.901 | 7.769 | 2.96E-14 | 9.33E-14 | 21.660 |
| KLK6 | 2.653 | 5.531 | 7.750 | 3.39E-14 | 1.07E-13 | 21.412 |
| FAM132B | 0.839 | 5.251 | 7.695 | 5.03E-14 | 1.56E-13 | 21.141 |
| NKD2 | 0.743 | 5.993 | 7.694 | 5.06E-14 | 1.57E-13 | 21.128 |
| TMEM74B | 0.608 | 5.684 | 7.667 | 6.14E-14 | 1.90E-13 | 21.040 |
| CRNDE | 1.244 | 5.493 | 7.686 | 5.35E-14 | 1.66E-13 | 21.004 |
| SLC4A11 | 0.788 | 5.697 | 7.653 | 6.79E-14 | 2.09E-13 | 20.988 |
| ELFN1-AS1 | 1.190 | 5.703 | 7.643 | 7.32E-14 | 2.25E-13 | 20.866 |
| CHI3L1 | 0.702 | 6.027 | 7.591 | 1.06E-13 | 3.23E-13 | 20.349 |
| FOXQ1 | 1.312 | 6.089 | 7.496 | 2.08E-13 | 6.22E-13 | 19.912 |
| RP13-890H12.2 | 0.731 | 4.957 | 7.524 | 1.71E-13 | 5.14E-13 | 19.874 |
| CST1 | 2.388 | 5.702 | 7.498 | 2.04E-13 | 6.11E-13 | 19.722 |
| PLA2G12B | -0.626 | 5.066 | -7.501 | 2.00E-13 | 6.00E-13 | 19.613 |
| GRIN2B | 0.778 | 5.672 | 7.451 | 2.85E-13 | 8.43E-13 | 19.593 |
| KRTAP5-1 | 0.687 | 5.097 | 7.449 | 2.88E-13 | 8.51E-13 | 19.475 |
| FAM150A | 1.156 | 5.142 | 7.428 | 3.33E-13 | 9.81E-13 | 19.250 |
| TNNI3 | 1.410 | 4.826 | 7.374 | 4.86E-13 | 1.42E-12 | 18.887 |
| DLX4 | 0.782 | 4.979 | 7.353 | 5.64E-13 | 1.64E-12 | 18.749 |
| TESC | 0.681 | 6.153 | 7.334 | 6.41E-13 | 1.86E-12 | 18.466 |
| RP11-150O12.6 | 0.918 | 5.423 | 7.257 | 1.09E-12 | 3.12E-12 | 18.269 |
| STRA6 | 1.293 | 5.694 | 7.235 | 1.27E-12 | 3.61E-12 | 18.100 |
| CLEC5A | 0.965 | 5.298 | 7.228 | 1.33E-12 | 3.77E-12 | 18.014 |
| ACBD7 | 0.661 | 5.111 | 7.153 | 2.21E-12 | 6.20E-12 | 17.569 |
| C2CD4A | 0.807 | 5.964 | 7.142 | 2.38E-12 | 6.66E-12 | 17.434 |
| RP11-752L20.3 | 0.593 | 5.073 | 7.105 | 3.06E-12 | 8.48E-12 | 17.277 |
| RP11-492E3.2 | 0.812 | 5.375 | 7.065 | 4.00E-12 | 1.10E-11 | 17.045 |
| CXCL8 | 0.621 | 6.175 | 7.122 | 2.73E-12 | 7.58E-12 | 16.962 |
| CORIN | 0.840 | 5.296 | 7.013 | 5.67E-12 | 1.54E-11 | 16.686 |
| TMEM105 | 0.815 | 5.335 | 7.010 | 5.78E-12 | 1.57E-11 | 16.685 |
| TG | 0.903 | 5.689 | 6.927 | 1.01E-11 | 2.69E-11 | 16.167 |
| IL11 | 1.189 | 5.376 | 6.869 | 1.47E-11 | 3.88E-11 | 15.693 |
| UCN | 0.736 | 5.008 | 6.864 | 1.52E-11 | 4.01E-11 | 15.656 |
| LY6G6C | 0.981 | 4.978 | 6.831 | 1.89E-11 | 4.97E-11 | 15.448 |
| COL11A1 | 1.235 | 5.963 | 6.800 | 2.30E-11 | 6.01E-11 | 15.375 |
| DHRS2 | 0.939 | 5.316 | 6.800 | 2.30E-11 | 6.01E-11 | 15.325 |
| MIR647 | 0.599 | 5.047 | 6.788 | 2.50E-11 | 6.51E-11 | 15.264 |
| CLDN14 | 0.921 | 4.988 | 6.788 | 2.49E-11 | 6.48E-11 | 15.191 |
| SIX4 | 0.658 | 5.117 | 6.767 | 2.85E-11 | 7.40E-11 | 15.148 |
| GAD1 | 1.428 | 5.151 | 6.766 | 2.87E-11 | 7.44E-11 | 15.061 |
| OLR1 | 0.736 | 5.468 | 6.734 | 3.54E-11 | 9.14E-11 | 14.964 |
| HTR1D | 1.087 | 5.674 | 6.698 | 4.46E-11 | 1.14E-10 | 14.750 |
| PRR36 | 0.815 | 5.702 | 6.683 | 4.92E-11 | 1.26E-10 | 14.616 |
| DSG4 | 0.724 | 5.125 | 6.652 | 5.96E-11 | 1.52E-10 | 14.424 |
| SLCO1B3 | 1.609 | 4.796 | 6.646 | 6.20E-11 | 1.57E-10 | 14.331 |
| CNTD2 | 1.231 | 5.494 | 6.588 | 8.96E-11 | 2.26E-10 | 14.001 |
| NPFFR1 | 0.768 | 5.507 | 6.563 | 1.05E-10 | 2.64E-10 | 13.921 |
| RP11-82L18.2 | 0.772 | 4.965 | 6.498 | 1.58E-10 | 3.92E-10 | 13.455 |
| LRRC36 | 0.694 | 5.457 | 6.440 | 2.27E-10 | 5.58E-10 | 13.180 |
| CXCL11 | 0.664 | 5.741 | 6.456 | 2.05E-10 | 5.05E-10 | 13.136 |
| NANOS3 | 1.006 | 5.056 | 6.439 | 2.28E-10 | 5.60E-10 | 13.113 |
| CTD-2540F13.2 | 0.683 | 5.020 | 6.405 | 2.82E-10 | 6.88E-10 | 12.939 |
| SNORA73B | 0.710 | 5.046 | 6.389 | 3.11E-10 | 7.58E-10 | 12.838 |
| DNAH5 | 0.670 | 5.183 | 6.375 | 3.38E-10 | 8.21E-10 | 12.812 |
| SAPCD1 | 0.694 | 4.971 | 6.368 | 3.54E-10 | 8.58E-10 | 12.704 |
| PKP1 | 0.696 | 5.734 | 6.376 | 3.37E-10 | 8.19E-10 | 12.692 |
| CASC8 | 0.835 | 5.237 | 6.344 | 4.10E-10 | 9.90E-10 | 12.606 |
| CYP2D7 | 0.770 | 5.200 | 6.297 | 5.47E-10 | 1.31E-09 | 12.334 |
| STK31 | 0.913 | 5.390 | 6.292 | 5.64E-10 | 1.35E-09 | 12.324 |
| KRT17 | 1.181 | 5.805 | 6.220 | 8.72E-10 | 2.06E-09 | 11.907 |
| C19orf26 | 0.699 | 5.157 | 6.170 | 1.17E-09 | 2.76E-09 | 11.619 |
| DNASE1L2 | 0.649 | 5.097 | 6.160 | 1.25E-09 | 2.93E-09 | 11.557 |
| RP11-1143G9.5 | 1.082 | 5.116 | 6.145 | 1.36E-09 | 3.19E-09 | 11.440 |
| PAH | 1.429 | 4.890 | 6.145 | 1.36E-09 | 3.19E-09 | 11.437 |
| SPATA3-AS1 | 0.709 | 4.983 | 6.107 | 1.72E-09 | 3.99E-09 | 11.226 |
| DPEP1 | 0.979 | 6.338 | 6.104 | 1.75E-09 | 4.06E-09 | 10.821 |
| TH | 1.027 | 4.906 | 6.030 | 2.70E-09 | 6.22E-09 | 10.797 |
| MYADML2 | 1.250 | 5.139 | 6.015 | 2.94E-09 | 6.75E-09 | 10.720 |
| POU5F1B | 1.002 | 5.632 | 5.961 | 4.04E-09 | 9.15E-09 | 10.444 |
| RP11-23P13.6 | 1.080 | 5.024 | 5.910 | 5.44E-09 | 1.22E-08 | 10.145 |
| RIPPLY3 | 1.028 | 4.891 | 5.876 | 6.60E-09 | 1.47E-08 | 9.964 |
| RP11-353N14.4 | 0.963 | 5.341 | 5.846 | 7.86E-09 | 1.74E-08 | 9.824 |
| SH3PXD2A-AS1 | 0.603 | 5.519 | 5.837 | 8.27E-09 | 1.83E-08 | 9.684 |
| C20orf195 | 0.697 | 5.078 | 5.808 | 9.73E-09 | 2.15E-08 | 9.620 |
| RP11-353N14.5 | 0.791 | 5.298 | 5.782 | 1.13E-08 | 2.49E-08 | 9.486 |
| GJB4 | 1.074 | 5.417 | 5.702 | 1.77E-08 | 3.85E-08 | 9.056 |
| KRT6B | 1.598 | 5.384 | 5.689 | 1.90E-08 | 4.11E-08 | 8.980 |
| RP3-323A16.1 | 0.696 | 5.198 | 5.637 | 2.54E-08 | 5.44E-08 | 8.724 |
| COL10A1 | 1.864 | 5.672 | 5.575 | 3.59E-08 | 7.60E-08 | 8.389 |
| TREM1 | 0.590 | 5.436 | 5.576 | 3.56E-08 | 7.56E-08 | 8.310 |
| PLAC4 | 1.008 | 4.957 | 5.558 | 3.93E-08 | 8.30E-08 | 8.301 |
| SLCO4A1-AS1 | 0.626 | 5.713 | 5.597 | 3.17E-08 | 6.75E-08 | 8.284 |
| TNNT2 | 0.747 | 4.923 | 5.552 | 4.07E-08 | 8.59E-08 | 8.268 |
| MMP1 | 0.643 | 6.180 | 5.618 | 2.83E-08 | 6.05E-08 | 7.972 |
| TACSTD2 | 0.649 | 5.945 | 5.558 | 3.93E-08 | 8.31E-08 | 7.903 |
| RP11-54H7.4 | 1.541 | 5.328 | 5.445 | 7.26E-08 | 1.50E-07 | 7.732 |
| IL1A | 0.678 | 5.224 | 5.424 | 8.13E-08 | 1.68E-07 | 7.623 |
| RP11-58O9.2 | 0.632 | 5.578 | 5.423 | 8.18E-08 | 1.69E-07 | 7.464 |
| BBOX1-AS1 | 1.304 | 5.083 | 5.348 | 1.22E-07 | 2.49E-07 | 7.249 |
| NOTUM | 1.894 | 5.767 | 5.303 | 1.54E-07 | 3.13E-07 | 7.030 |
| NXPH4 | 0.988 | 5.148 | 5.275 | 1.79E-07 | 3.61E-07 | 6.890 |
| MCEMP1 | 0.843 | 4.819 | 5.234 | 2.22E-07 | 4.44E-07 | 6.690 |
| PIWIL1 | 1.285 | 5.144 | 5.231 | 2.26E-07 | 4.51E-07 | 6.677 |
| MMP10 | 0.985 | 5.359 | 5.222 | 2.36E-07 | 4.70E-07 | 6.639 |
| TLX1 | 1.185 | 5.380 | 5.217 | 2.42E-07 | 4.82E-07 | 6.613 |
| SP5 | 0.615 | 5.817 | 5.270 | 1.84E-07 | 3.70E-07 | 6.520 |
| KIAA1875 | 0.617 | 5.268 | 5.186 | 2.84E-07 | 5.63E-07 | 6.423 |
| TCN1 | 1.555 | 5.358 | 5.168 | 3.12E-07 | 6.17E-07 | 6.376 |
| RP11-776H12.1 | 1.131 | 5.027 | 5.132 | 3.76E-07 | 7.37E-07 | 6.204 |
| RP11-474D1.3 | 2.374 | 5.488 | 5.130 | 3.79E-07 | 7.42E-07 | 6.197 |
| UCA1 | 0.667 | 5.849 | 5.196 | 2.70E-07 | 5.37E-07 | 6.145 |
| SLC22A11 | 1.163 | 4.999 | 5.118 | 4.03E-07 | 7.89E-07 | 6.139 |
| MMP7 | 1.628 | 5.992 | 4.997 | 7.43E-07 | 1.43E-06 | 5.560 |
| RP11-326C3.2 | 0.727 | 5.444 | 5.009 | 6.98E-07 | 1.34E-06 | 5.543 |
| KLK10 | 0.678 | 5.980 | 5.030 | 6.29E-07 | 1.21E-06 | 5.228 |
| CA9 | 0.759 | 5.917 | 4.882 | 1.31E-06 | 2.47E-06 | 4.655 |
| CLDN2 | 1.057 | 6.196 | 4.875 | 1.36E-06 | 2.56E-06 | 4.605 |
| MSX2 | 0.924 | 5.731 | 4.797 | 1.98E-06 | 3.68E-06 | 4.492 |
| FABP6 | 1.420 | 5.620 | 4.748 | 2.51E-06 | 4.62E-06 | 4.449 |
| TMPRSS5 | 0.678 | 5.041 | 4.736 | 2.65E-06 | 4.89E-06 | 4.390 |
| SAA2 | 0.876 | 5.103 | 4.699 | 3.17E-06 | 5.80E-06 | 4.232 |
| MMP3 | 0.937 | 5.979 | 4.661 | 3.79E-06 | 6.88E-06 | 3.726 |
| PRSS33 | 1.122 | 5.271 | 4.567 | 5.89E-06 | 1.05E-05 | 3.663 |
| PPAPDC1A | 0.722 | 5.201 | 4.512 | 7.58E-06 | 1.34E-05 | 3.387 |
| XXbac-BPG32J3.19 | 1.561 | 5.173 | 4.475 | 8.97E-06 | 1.58E-05 | 3.276 |
| COMP | 1.439 | 5.618 | 4.446 | 1.02E-05 | 1.80E-05 | 3.155 |
| RP11-329L6.2 | 0.690 | 5.318 | 4.451 | 9.98E-06 | 1.76E-05 | 3.113 |
| ALDH3B2 | 0.892 | 5.078 | 4.399 | 1.27E-05 | 2.21E-05 | 2.961 |
| CXCL5 | 1.011 | 5.611 | 4.321 | 1.79E-05 | 3.08E-05 | 2.535 |
| RP11-927P21.4 | 0.592 | 4.877 | 4.283 | 2.11E-05 | 3.62E-05 | 2.495 |
| UNC93A | 0.995 | 5.194 | 4.277 | 2.17E-05 | 3.72E-05 | 2.468 |
| SLC13A3 | 0.651 | 5.462 | 4.301 | 1.95E-05 | 3.35E-05 | 2.355 |
| LY6G6D | 1.482 | 5.134 | 4.215 | 2.84E-05 | 4.81E-05 | 2.222 |
| DSG3 | 1.044 | 5.344 | 4.189 | 3.17E-05 | 5.35E-05 | 2.110 |
| GLYATL1 | 0.661 | 5.191 | 4.119 | 4.29E-05 | 7.16E-05 | 1.771 |
| CEL | 0.920 | 5.718 | 4.139 | 3.92E-05 | 6.57E-05 | 1.694 |
| SLC35D3 | 0.804 | 5.366 | 4.076 | 5.13E-05 | 8.52E-05 | 1.578 |
| NPW | 0.639 | 4.992 | 4.023 | 6.40E-05 | 0.000105486 | 1.476 |
| MGC32805 | 0.805 | 5.135 | 4.023 | 6.39E-05 | 0.000105302 | 1.467 |
| GUCY1B2 | 0.594 | 4.887 | 4.008 | 6.80E-05 | 0.000111828 | 1.424 |
| CSF3 | 0.787 | 5.124 | 3.963 | 8.19E-05 | 0.000133889 | 1.249 |
| TMEM211 | 0.842 | 5.247 | 3.953 | 8.53E-05 | 0.000139159 | 1.186 |
| KRT23 | 1.224 | 5.950 | 3.933 | 9.25E-05 | 0.000150562 | 0.919 |
| PRKCG | 0.673 | 4.898 | 3.684 | 0.000247925 | 0.000388716 | 0.256 |
| REG1B | 1.140 | 5.040 | 3.457 | 0.000580627 | 0.000878499 | -0.510 |
| TSPEAR | 0.623 | 4.918 | 3.454 | 0.000586785 | 0.00088765 | -0.525 |
| AMH | 0.698 | 5.116 | 3.400 | 0.000713802 | 0.001069417 | -0.730 |
| TRPM2-AS | 0.870 | 5.362 | 3.399 | 0.000716768 | 0.001073463 | -0.793 |
| MUC5AC | 0.663 | 5.557 | 3.281 | 0.00108945 | 0.001604489 | -1.407 |
| REG3A | 1.201 | 5.451 | 2.668 | 0.00782254 | 0.010629556 | -2.804 |
| AC016735.2 | 0.606 | 4.907 | 2.602 | 0.009467159 | 0.012739418 | -2.966 |
| DUSP27 | 0.866 | 5.297 | 2.425 | 0.015556721 | 0.020486659 | -3.445 |
| REG1A | 1.036 | 5.872 | 2.375 | 0.017834296 | 0.023357008 | -3.863 |
